# Supplementary material for: A three-species microbial consortium for power generation
Source: Royal Society of Chemistry journal article supplement (doi:10.1039/c6ee03705d), 2017-01-01
Supplement: c6ee03705d1.pdf [file c6ee03705d1.pdf]

## Supporting Information

### A three-species microbial consortium for power generation

Yue Liu,<sup>abc</sup> Mingzhu Ding,<sup>ab</sup> Wei Ling,<sup>abc</sup> Yun Yang,<sup>d</sup> Xiao Zhou,<sup>ab</sup> Bingzhi Li,<sup>abc</sup> Tao Chen,<sup>ab</sup> Yong Nie,<sup>e</sup> Miaoxiao Wang,<sup>e</sup> Boxuan Zeng,<sup>ab</sup> Xia Li,<sup>ab</sup> Hong Liu,<sup>ab</sup> Baode Sun,<sup>abc</sup> Heming Xu,<sup>abc</sup> Jiamei Zhang,<sup>abc</sup> Yi Jiao,<sup>abc</sup> Yanan Hou,<sup>abc</sup> Hui Yang,<sup>abc</sup> Sijia Xiao,<sup>abc</sup> Qucheng Lin,<sup>abc</sup> Xinzi He,<sup>abc</sup> Wenjie Liao,<sup>abc</sup> Zeqi Jin,<sup>abc</sup> Yufei Xie,<sup>abc</sup> Bofeng Zhang,<sup>abc</sup> Tianyu Li,<sup>abc</sup> Xi Lu,<sup>abc</sup> Jiabei Li,<sup>abc</sup> Fan Zhang,<sup>abc</sup> Xiaolei Wu,<sup>e</sup> Hao Song,<sup>\*ab</sup> Yingjin Yuan,<sup>\*abc</sup>

<sup>a</sup> Key Laboratory of Systems Bioengineering (Ministry of Education), School of Chemical Engineering and Technology, Tianjin University, Tianjin, 300072, China

<sup>b</sup> SynBio Research Platform, Collaborative Innovation Centre of Chemical Science and Engineering (Tianjin), Tianjin University, Tianjin, 300072, China

<sup>c</sup> Team TJU for the International Genetically Engineered Machine Competition (iGEM), Tianjin, 300072, China

<sup>d</sup> School of Chemistry and Environment, Beihang University, Beijing, 100191, China

<sup>e</sup> Department of Energy and Resources Engineering, College of Engineering, Peking University, Beijing, 10087, China

\*To whom correspondence may be addressed. E-mail: [yjyuan@tju.edu.cn](mailto:yjyuan@tju.edu.cn) or [hsong@tju.edu.cn](mailto:hsong@tju.edu.cn)

## Supporting Figures & Figure captions

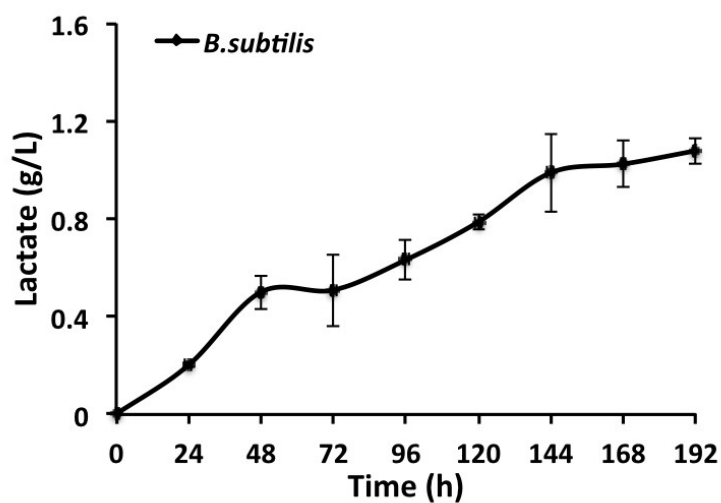

**Figure S1. Functional redundancy of *B. subtilis* for lactate production.** In anaerobic condition, *B. subtilis* could convert glucose to lactate and produced 1.1 g/L lactate in 192 h. However, the rate was much slower than *E. coli*, which produced 1.3 g/L lactate in 48 h at the same cultural condition. In the absence of *E. coli*, *B. subtilis* had the complementary role to provide carbon source that maintained the function of the three-species consortium.

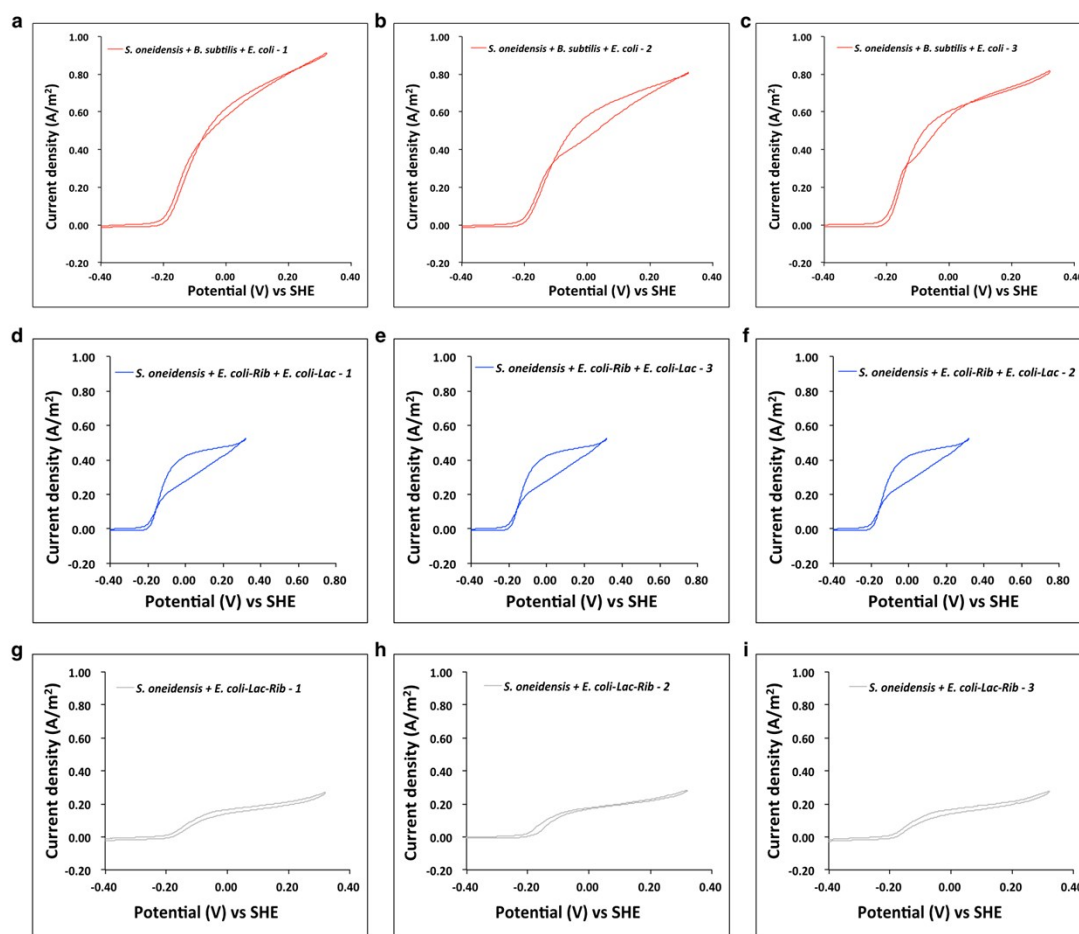

**Figure S2. Turnover cyclic voltammetry (CV) of synthetic microbial consortia.**

Turnover cyclic voltammetry (CV) at a low scan rate of 1mV/s. (a - c) Replicative experimental results of *S. oneidensis* + *B. subtilis* + *E. coli*-Lac consortium; (d - f) Replicative experimental results of CV of *S. oneidensis* + *E. coli*-Rib + *E. coli*-Lac consortium; (g - i) Replicative experimental results of *S. oneidensis* + *E. coli*-Lac-Rib consortium.

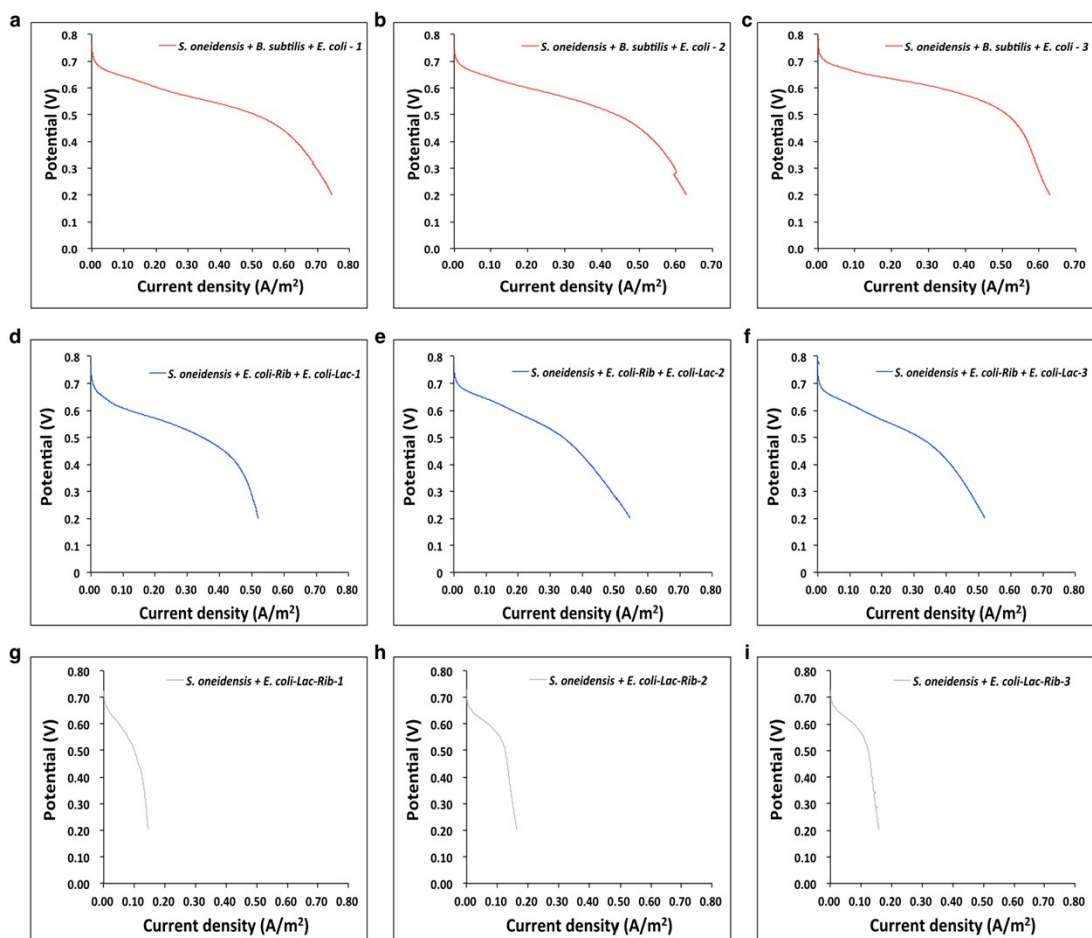

**Figure S3. Linear sweep voltammetry (LSV) of synthetic microbial consortia.** Polarization curves got by linear sweep voltammetry (LSV) with a low scan rate of 0.1mV/s. (a - c) Replicative experimental results of *S. oneidensis* + *B. subtilis* + *E. coli*-Lac consortium; (d - f) Replicative experimental results of CV of *S. oneidensis* + *E. coli*-Rib + *E. coli*-Lac consortium; (g - i) Replicative experimental results of *S. oneidensis* + *E. coli*-Lac-Rib consortium.

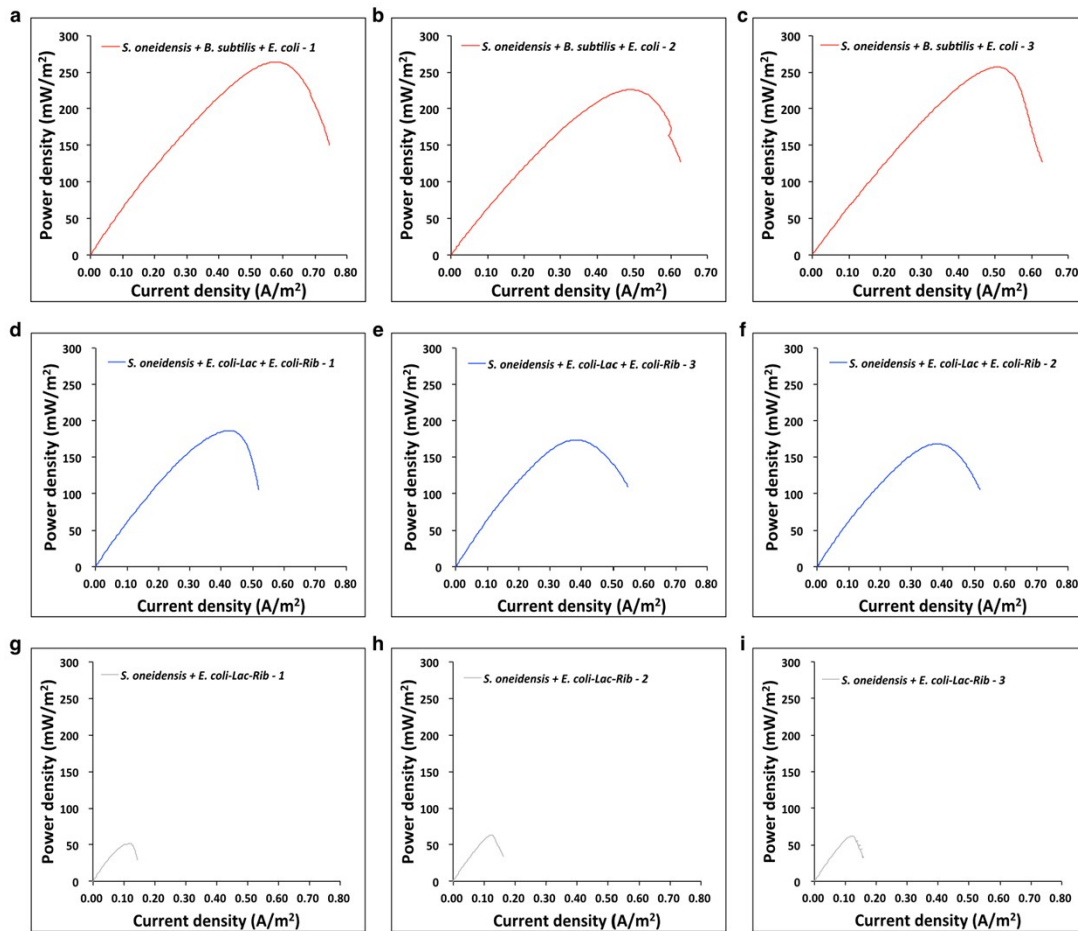

**Figure S4. Power density output curves of synthetic microbial consortia.** (a - c) Replicative experimental results of *S. oneidensis* + *B. subtilis* + *E. coli*-Lac consortium; (d - f) Replicative experimental results of CV of *S. oneidensis* + *E. coli*-Rib + *E. coli*-Lac consortium; (g - i) Replicative experimental results of *S. oneidensis* + *E. coli*-Lac-Rib consortium.
